# Supplementary material for: Larval transcriptomic response to host plants in two related phytophagous lepidopteran species: implications for host specialization and species divergence
Source: BMC Genomics. 2018 Apr 18;19:265. doi: 10.1186/s12864-018-4589-x (PMC5907310; doi:10.1186/s12864-018-4589-x)
Supplement: Supplementary file 5 — Table S7. Detailed information for DE genes displaying significant sequence similarity to genes previously described in bacteria: mean normalized counts per experimental set-up, model effects (host plant, moth species, interaction) and functional annotations. (XLSX 46 kb) [file 12864_2018_4589_MOESM5_ESM.xlsx]

## Sheet: Feuil1
legend
	significant effect in GLM for the bacterial genus			normalized read counts
gi|674993598|dbj|AP014630.1|	significant effect in GLM for the reference transcript			mean	mean	mean	mean		36714	72068	326972	73884	60926	44072	28662	50810	34556
				ECB	ECB	ABB	ABB
				on mugwort	on maize	on mugwort	on maize
Genbank ID	taxa	taxa_genus	GLM effects
gi|549067804|dbj|AP012551.1|	Plautia stali symbiont DNA, complete genome	Plautia	Plant,Interaction	892.634	6881.32	849.273	10803.8
gi|578897545|gb|KF309173.1|	Craurococcus sp. HM28-1 16S ribosomal RNA gene, partial sequence	Craurococcus		24.0133	5485.11	0	17.775
gi|308056051|gb|CP002206.1|	Pantoea vagans C9-1, complete genome	Pantoea		1224.7	1210.11	2054.8	1139.15
gi|310975013|ref|NR_036877.1|	Craurococcus roseus strain NS130 16S ribosomal RNA gene, partial sequence_x0001_D85828.1 Craurococcus rose	Craurococcus		0	1500.45	0	0
gi|316947855|gb|CP002433.1|	Pantoea sp. At-9b, complete genome	Pantoea		212.266	1779.36	394.455	2529.64
gi|119372524|gb|CP000489.1|	Paracoccus denitrificans PD1222 chromosome 1, complete sequence	Paracoccus		2189.19	375.063	1741.21	125.559
gi|674790876|gb|CP006936.2|	Mycobacterium neoaurum VKM Ac-1815D, complete genome	Mycobacterium		3100.98	420.663	998.261	161.109
gi|529579793|gb|CP006650.1|	Paracoccus aminophilus JCM 7686, complete genome	Paracoccus		1574.7	381.16	1473.86	125.559
gi|295919923|gb|CP002005.1|	Moraxella catarrhalis BBH18, complete genome	Moraxella		1963.4	215.268	699.16	157.895
gi|507147619|gb|KF037621.1|	Uncultured bacterium clone YL503 16S ribosomal RNA gene, partial sequence	Uncultured	Plant,Interaction	13.0836	6709.04	0	0
gi|674993598|dbj|AP014630.1|	Acinetobacter guillouiae DNA, complete geonome, strain: NBRC 110550	Acinetobacter	Plant	9598.81	658.429	2255.54	459.918
gi|160338056|gb|EU182125.1|	Uncultured bacterium clone D15_1_SW_H_73 16S ribosomal RNA gene, partial sequence	bacterium		311392	455403	321640	413611
gi|160338023|gb|EU182092.1|	Uncultured bacterium clone D15_1_SW_H_19 16S ribosomal RNA gene, partial sequence	bacterium		48155.9	72604	50412.1	68586.8
gi|395629241|gb|JQ307077.1|	Uncultured bacterium clone 13_1512ur_4 16S ribosomal RNA gene, partial sequence	bacterium		8765.6	62024.7	9299.36	12614.6
gi|549138278|emb|HG518618.1|	Uncultured bacterium partial 16S rRNA gene, clone 38	Uncultured		36769.6	49279.7	36399.3	42133.1
gi|160338043|gb|EU182112.1|	Uncultured bacterium clone D15_1_SW_H_46 16S ribosomal RNA gene, partial sequence	bacterium		28449.8	45431.3	30834	40567.6
gi|496405902|gb|KC170995.1|	Uncultured Klebsiella sp. clone M2.9 16S ribosomal RNA gene, partial sequence	Uncultured		13456.5	32973.9	13511.5	17418.6
gi|387597987|dbj|AB719859.1|	Bacterium IS422 gene for 16S rRNA, partial sequence	Bacterium		17678.4	22243.9	13376.9	17024.6
gi|387597988|dbj|AB719860.1|	Bacterium IS423 gene for 16S rRNA, partial sequence	Bacterium		13676	19549.1	11492.3	14760.1
gi|387597986|dbj|AB719858.1|	Bacterium IS421 gene for 16S rRNA, partial sequence	Bacterium		12267.6	17405.8	10527.7	12913.7
gi|674173172|gb|KM163622.1|	Uncultured bacterium clone Espejo_9_20_11_Water.75140 16S ribosomal RNA gene, partial sequence	bacterium		10756	15424.7	10581.5	13678.1
gi|160337981|gb|EU182049.1|	Uncultured bacterium clone D15_7_SW_G_13 16S ribosomal RNA gene, partial sequence	bacterium		1045.6	11793.9	942.002	1433.61
gi|395629243|gb|JQ307079.1|	Uncultured bacterium clone 13_1512ur_6 16S ribosomal RNA gene, partial sequence	bacterium		4026.93	8799.03	3682.43	5031.94
gi|496405901|gb|KC170994.1|	Uncultured Citrobacter sp. clone M2.2 16S ribosomal RNA gene, partial sequence	Uncultured		1371.07	8658.99	1141.95	1566.58
gi|549138243|emb|HG518583.1|	Uncultured bacterium partial 16S rRNA gene, clone 3_x0001_HG518588.1 Uncultured bacterium partial 16S rRNA	Uncultured		6701.05	9275.82	6275.17	8337.97
gi|549138279|emb|HG518619.1|	'uncultured bacterium'	uncultured		6464.94	8797.37	7094.29	7876.2
gi|549138248|emb|HG518588.1|	'uncultured bacterium'	uncultured		6368.94	8788.66	6600.95	8426.05
gi|549138280|emb|HG518620.1|	'uncultured bacterium'	uncultured		6924.98	8741.23	6282.29	7721.14
gi|395629242|gb|JQ307078.1|	Uncultured bacterium clone 13_1512ur_5 16S ribosomal RNA gene, partial sequence	bacterium		12435.1	3625.28	2321.49	5119.53
gi|549138281|emb|HG518621.1|	'uncultured bacterium'	uncultured		6285.5	8765.13	6252.93	8074.48
gi|549138272|emb|HG518612.1|	'uncultured bacterium'	uncultured		7031.91	8201.25	6236	7260.77
gi|670934364|gb|CP006587.1|	Hymenobacter sp. APR13, complete genome	Hymenobacter		179.689	7398.38	300.491	20.914
gi|239837778|gb|CP001628.1|	Micrococcus luteus NCTC 2665, complete genome	Micrococcus		12052.4	2938.91	4587.13	1306.72
gi|586953861|gb|CP007145.1|	Hymenobacter swuensis DY53, complete genome	Hymenobacter		59.5193	5586.68	126.847	32.9782
gi|511633744|gb|KF006350.1|	'uncultured bacterium'	uncultured		35.4543	5354.02	45.1813	12.0643
gi|643040402|gb|KF844441.1|	Uncultured bacterium clone DEy3au140 16S ribosomal RNA gene, partial sequence	bacterium		2346	4132.07	703.604	1138.73
gi|643040394|gb|KF844433.1|	Uncultured bacterium clone DEy3au132 16S ribosomal RNA gene, partial sequence	bacterium		1781.76	4108.72	992.209	852.215
gi|400532538|gb|JX219396.1|	Sphingomonas sp. SL9 16S ribosomal RNA gene, partial sequence; 16S-23S ribosomal RNA intergenic spac	Sphingomonas		277.845	4078.53	850.579	247.412
gi|636671608|gb|KJ693608.1|	Uncultured bacterium clone S08_CY_56 genomic sequence	Uncultured		278.976	4021.55	844.494	20.914
gi|507147522|gb|KF037524.1|	Uncultured bacterium clone YZ704 16S ribosomal RNA gene, partial sequence	Uncultured		0	4243.55	14.6209	0
gi|569540043|gb|CP006644.1|	Sphingomonas sanxanigenens NX02, complete genome	Sphingomonas		685.311	3778.89	662.379	152.184
gi|469477505|gb|CP004036.1|	Sphingomonas sp. MM-1, complete genome	Sphingomonas		837.635	3477.54	803.654	95.7957
gi|209529865|gb|CP001189.1|	Gluconacetobacter diazotrophicus PAl 5, complete genome	Gluconacetobacter		9.28714	3873.4	82.6569	20.914
gi|643041247|gb|KF845286.1|	Uncultured bacterium clone MC2D1u1799 16S ribosomal RNA gene, partial sequence	bacterium		2076.8	3055.43	1361.57	1098.98
gi|549138277|emb|HG518617.1|	Uncultured bacterium partial 16S rRNA gene, clone 37	Uncultured		2992.11	4169.7	3024.55	2888.13
gi|297163432|gb|CP002049.1|	Truepera radiovictrix DSM 17093, complete genome	Truepera		0	3706.76	22.5906	0
gi|643041243|gb|KF845282.1|	Uncultured bacterium clone MC2D1u1786 16S ribosomal RNA gene, partial sequence	bacterium		4176.73	1754.49	1078.69	1990.42
gi|643041285|gb|KF845324.1|	Uncultured bacterium clone MC2T1u1849 16S ribosomal RNA gene, partial sequence	bacterium		953.063	3063.32	337.477	606.807
gi|643041234|gb|KF845273.1|	Uncultured bacterium clone MC2D1u1771 16S ribosomal RNA gene, partial sequence	bacterium		911.555	2874.93	324.767	604.085
gi|395477328|gb|JQ078804.1|	Uncultured bacterium clone HAV7D9G03CHBE9 16S ribosomal RNA gene, partial sequence	bacterium		0	3212.41	0	0
gi|582020631|gb|CP004360.1|	Gluconacetobacter xylinus E25, complete genome	Gluconacetobacter		24.0133	3035.85	130.964	17.775
gi|470468600|ref|NR_076127.1|	Micrococcus luteus strain NCTC 2665 23S ribosomal RNA gene, complete sequence	Micrococcus		4826.04	988.816	1993.38	540.51
gi|87133707|gb|CP000248.1|	Novosphingobium aromaticivorans DSM 12444, complete genome	Novosphingobium		728.462	1893.15	946.206	107.784
gi|148498119|gb|CP000699.1|	Sphingomonas wittichii RW1, complete genome	Sphingomonas		782.175	2048.56	875.71	295.669
gi|470268861|gb|KC523625.1|	Uncultured bacterium clone HC51 16S ribosomal RNA gene, partial sequence	bacterium		22.3707	2339.9	0	0
gi|201084348|gb|CP000980.1|	Borrelia duttonii Ly plasmid pl23, partial sequence	Borrelia		1866.17	1479.26	1519.19	3016.33
gi|564736995|gb|CP006735.1|	Thermosynechococcus sp. NK55 genome	Thermosynechococcus		10.9297	2228.34	16.2354	0
gi|399936050|gb|JX096255.1|	Uncultured bacterium clone Hmb1-46 16S ribosomal RNA gene, partial sequence	bacterium		2858.38	1429.77	886.451	1386.33
gi|470486385|ref|NR_076754.1|	Truepera radiovictrix strain RQ-24 23S ribosomal RNA gene, complete sequence	Truepera		10.9297	1916.87	7.96973	0
gi|219994503|gb|CP001339.1|	Thioalkalivibrio sulfidophilus HL-EbGr7, complete genome	Thioalkalivibrio		1480	1230.93	1361.81	2328.82
gi|188532096|gb|EU679658.1|	Sphingobium chungbukense rrnA operon, complete sequence	Sphingobium		520.24	1478.12	472.693	93.2996
gi|334103126|gb|CP002799.1|	Sphingobium chlorophenolicum L-1 chromosome 2, complete sequence	Sphingobium		889.618	1344.16	737.259	131.913
gi|643041691|gb|KF845730.1|	Uncultured bacterium clone RKMbTu2850 16S ribosomal RNA gene, partial sequence	Uncultured		1073.83	1211.83	1353.85	710.696
gi|254044096|gb|CP001617.1|	Lactobacillus plantarum JDM1, complete genome	Lactobacillus		9.28714	1698.74	0	12.0643
gi|353454017|gb|CP003084.1|	Propionibacterium acnes ATCC 11828, complete genome	Propionibacterium		1537.79	593.28	1779.05	1006.78
gi|481319564|gb|CP003293.1|	Propionibacterium acnes HL096PA1, complete genome	Propionibacterium		1688.43	733.766	1708.11	930.273
gi|389616181|emb|HE800198.1|	Uncultured bacterium partial 16S rRNA gene, DGGE band zj-9_x0001_JQ808512.1 Uncultured fungus clone zj_9 s	Uncultured		1133.49	1238.84	405.083	629.726
gi|291375051|gb|CP001977.1|	Propionibacterium acnes SK137, complete genome	Propionibacterium		1536.49	572.864	1889.72	1055.68
gi|389616173|emb|HE800190.1|	Uncultured bacterium partial 16S rRNA gene, DGGE band zj-1_x0001_JQ808504.1 Uncultured fungus clone zj_1 s	Uncultured		21.8594	1609.51	14.6209	36.1928
gi|98975575|gb|CP000356.1|	Sphingopyxis alaskensis RB2256, complete genome	Sphingopyxis		1093.24	1227.67	341.626	48.2571
gi|332674398|gb|CP002409.1|	Propionibacterium acnes 266, complete genome	Propionibacterium		1920.14	682.068	1466.48	871.579
gi|667665922|dbj|AP012549.1|	Cyanobacterium endosymbiont of Epithemia turgida isolate EtSB Lake Yunoko DNA, complete genome	Cyanobacterium		10.9297	1566.55	15.9395	0
gi|365740656|gb|CP003196.1|	Propionibacterium acnes TypeIA2 P.acn17, complete genome	Propionibacterium		1489.2	669.145	1714.43	937.611
gi|407902950|gb|CP003877.1|	Propionibacterium acnes C1, complete genome	Propionibacterium		1528.74	678.375	1739.69	714.327
gi|657118275|gb|CP006032.1|	Propionibacterium acnes hdn-1, complete genome	Propionibacterium		1952.58	644.02	1514.97	708.049
gi|308044682|gb|CP002222.1|	Lactobacillus plantarum subsp. plantarum ST-III, complete genome	Lactobacillus		10.9297	1559.94	0	0
gi|335276409|gb|CP002815.1|	Propionibacterium acnes 6609, complete genome	Propionibacterium		1752.1	640.5	1452.4	967.034
gi|507147505|gb|KF037507.1|	Uncultured bacterium clone YZ614 16S ribosomal RNA gene, partial sequence	Uncultured		0	1516.97	0	0
gi|365738411|gb|CP003197.1|	Propionibacterium acnes TypeIA2 P.acn31, complete genome	Propionibacterium		1597.66	604.434	1589.48	782.855
gi|229465006|gb|CP001277.1|	Candidatus Hamiltonella defensa 5AT (Acyrthosiphon pisum) genome	Candidatus		90.6142	75.6423	3594.13	69.1711
gi|643420824|gb|KF100497.1|	Uncultured eukaryote clone ncd2069h07c1 16S ribosomal RNA gene, partial sequence; plastid	Uncultured		27.8614	1477.31	0	0
gi|50839098|gb|AE017283.1|	Propionibacterium acnes KPA171202, complete genome	Propionibacterium		1543.47	479.507	1408.7	1046.04
gi|448273020|gb|CP004082.1|	Lactobacillus plantarum ZJ316, complete genome	Lactobacillus		0	1444.26	0	17.775
gi|643041703|gb|KF845742.1|	Uncultured bacterium clone RKMbTu2868 16S ribosomal RNA gene, partial sequence	Uncultured		736.866	1123.98	809.476	414.308
gi|365742920|gb|CP003195.1|	Propionibacterium acnes TypeIA2 P.acn33, complete genome	Propionibacterium		1550.15	573.376	1407.58	874.944
gi|470475933|ref|NR_076309.1|	Sphingobium sp. SYK-6 23S ribosomal RNA gene, complete sequence	Sphingobium		1131.82	940.514	448.784	50.7532
gi|513034319|gb|CP006033.1|	Lactobacillus plantarum 16, complete genome	Lactobacillus		10.9297	1388.08	0	0
gi|398652061|gb|CP002972.1|	Phaeobacter gallaeciensis 2.10, complete genome	Phaeobacter		1029.08	799.483	1291.73	1767.66
gi|499053647|gb|CP005942.1|	'Lactobacillus plantarum subsp. plantarum P-8'	Lactobacillus		9.28714	1378.16	0	0
gi|395474893|gb|JQ076369.1|	Uncultured bacterium clone G4TICC404JKPO6 16S ribosomal RNA gene, partial sequence	bacterium		0	1378.16	0	0
gi|662020116|ref|NR_122003.1|	Hymenobacter swuensis strain DY53 23S ribosomal RNA gene, complete sequence	Hymenobacter		0	1358.33	52.1284	20.914
gi|472820487|emb|HE614873.1|	Clavibacter michiganensis subsp. nebraskensis NCPPB 2581 complete genome	Clavibacter		224.327	662.609	1617.68	145.339
gi|298698338|gb|CP002080.1|	Acinetobacter oleivorans DR1, complete genome	Acinetobacter		3352.95	346.508	505.286	311.667
gi|389547862|gb|JQ402790.1|	Uncultured Acetobacteraceae bacterium clone CNY_03253 16S ribosomal RNA gene, partial sequence	Acetobacteraceae		0	1308.76	0	0
gi|516551423|gb|KC919339.1|	Uncultured bacterium clone YO00817F11 16S ribosomal RNA gene, partial sequence_x0001_KC919551.1 Uncultured	Uncultured		1226.16	1460.61	791.895	941.846
gi|643041017|gb|KF845056.1|	Uncultured bacterium clone MC1G1u1475 16S ribosomal RNA gene, partial sequence	bacterium		67.1122	1288.05	45.4772	176.388
gi|227452846|gb|CP001601.1|	Corynebacterium aurimucosum ATCC 700975, complete genome	Corynebacterium		1396.69	536.138	1523.38	268.251
gi|452813606|gb|KC358234.1|	Uncultured bacterium clone 091808_22m_03D 16S ribosomal RNA gene, partial sequence	bacterium		0	1245.97	0	0
gi|516552203|gb|KC919551.1|	'uncultured bacterium'	uncultured		1051.5	1173.51	785.868	1631.4
gi|302141022|gb|HM641471.1|	Uncultured bacterium clone 1026B47 16S ribosomal RNA gene, partial sequence	bacterium		0	1232.75	0	0
gi|516553250|gb|KC920096.1|	Uncultured bacterium clone YO00827A11 16S ribosomal RNA gene, partial sequence	Uncultured		1112.56	1269.11	856.869	1108.67
gi|578035003|emb|FO538765.1|	Magnetospira sp. QH-2 chromosome, complete genome	Magnetospira		22.3707	1211.82	37.5075	0
gi|470477993|ref|NR_076422.1|	Sphingopyxis alaskensis strain RB2256 23S ribosomal RNA gene, complete sequence	Sphingopyxis		1052.81	878.753	291.408	62.8175
gi|427977893|gb|CP003590.1|	Pleurocapsa sp. PCC 7327, complete genome	Pleurocapsa		10.9297	1169.95	0	12.0643
gi|516553025|gb|KC919971.1|	'uncultured bacterium'	uncultured		1099.68	1107.91	903.723	1064.12
gi|516551425|gb|KC919340.1|	Uncultured bacterium clone YO00817H05 16S ribosomal RNA gene, partial sequence	Uncultured		1006.6	1488.67	729.295	999.444
gi|114314838|gb|CP000394.1|	Granulibacter bethesdensis CGDNIH1, complete genome	Granulibacter		49.7208	1118.98	88.7162	45.0425
gi|516551451|gb|KC919350.1|	Uncultured bacterium clone YO00817D02 16S ribosomal RNA gene, partial sequence	Uncultured		918.347	1228.34	894.775	1054.47
gi|586599970|gb|CP003181.1|	Granulibacter bethesdensis CGDNIH3, complete genome	Granulibacter		37.1486	1080.72	65.5336	41.9035
gi|670928808|gb|CP006270.1|	Synechococcus sp. KORDI-49, complete genome	Synechococcus		880.698	970.184	1026.21	1051.33
gi|284809060|gb|CP001842.1|	Candidatus Atelocyanobacterium thalassa isolate ALOHA, complete genome	Candidatus		9.28714	1103.85	22.5906	12.0643
gi|460607639|gb|JX726587.1|	Uncultured bacterium clone C15::G9RA0RH03FSV26 16S ribosomal RNA gene, partial sequence	bacterium		0	1110.46	0	0
gi|643041387|gb|KF845426.1|	Uncultured bacterium clone MNa1Du2078 16S ribosomal RNA gene, partial sequence	bacterium		905.873	671.64	463.997	349.486
gi|146400702|gb|CP000697.1|	Acidiphilium cryptum JF-5, complete genome	Acidiphilium		44.2301	991.484	140.221	17.775
gi|301297681|gb|HM796883.1|	Uncultured bacterium clone AK498_13103 16S ribosomal RNA gene, partial sequence	bacterium		0	1050.97	0	0
gi|411031483|gb|JX627616.1|	Sporosarcina globispora strain E20 16S ribosomal RNA gene, partial sequence	Sporosarcina		1072.49	500.559	730.248	1416.55
gi|326373602|gb|JF295967.1|	Uncultured bacterium clone Lehavim45b01 16S ribosomal RNA gene, partial sequence	bacterium		0	1021.23	0	0
gi|403494063|gb|JX255365.1|	Uncultured bacterium clone abscm03.0.264 16S ribosomal RNA gene, partial sequence	bacterium		0	1021.23	0	0
gi|470475773|ref|NR_076300.1|	Microbacterium testaceum strain StLB037 23S ribosomal RNA gene, complete sequence	Microbacterium		269.069	166.057	1948.64	177.75
gi|389547760|gb|JQ402688.1|	Uncultured Acetobacteraceae bacterium clone CNY_03115 16S ribosomal RNA gene, partial sequence	Acetobacteraceae		0	1011.31	0	0
gi|168192641|gb|CP000943.1|	Methylobacterium sp. 4-46, complete genome	Methylobacterium		101.544	986.197	101.723	38.6889
gi|604876398|gb|CP007203.2|	Nodularia spumigena CCY9414 genome	Nodularia		22.3707	993.69	23.9092	0
gi|301268169|gb|HM731518.1|	Uncultured bacterium clone GB7N87003GIB0R small subunit ribosomal RNA gene, partial sequence	bacterium		0	981.57	0	0
gi|470491309|ref|NR_077032.1|	Modestobacter marinus strain BC501 23S ribosomal RNA, complete sequence	Modestobacter		123.966	618.025	785.735	12.0643
gi|427353741|gb|CP003946.1|	Leptolyngbya sp. PCC 7376, complete genome	Leptolyngbya		0	925.385	7.96973	0
gi|284061874|gb|CP001867.1|	Geodermatophilus obscurus DSM 43160, complete genome	Geodermatophilus		155.061	723.784	430.606	0
gi|586605219|gb|CP003183.1|	Granulibacter bethesdensis CGDNIH2, complete genome	Granulibacter		34.943	894.542	87.1017	0
gi|428262672|gb|CP003646.1|	Gloeocapsa sp. PCC 7428, complete genome	Gloeocapsa		53.5173	869.201	70.705	0
gi|585302946|emb|FO818640.1|	Arthrospira sp. str. PCC 8005 chromosome, complete genome	Arthrospira		24.0133	901.152	7.96973	0
gi|400532537|gb|JX219395.1|	Sphingomonas sp. SL8 23S ribosomal RNA gene, partial sequence	Sphingomonas		148.388	699.55	416.313	113.495
gi|453201826|gb|JQ999734.1|	Uncultured bacterium clone GKJWQY101BXHYA 23S ribosomal RNA gene, partial sequence	bacterium		37.0969	824.841	127.246	0
gi|545575172|gb|CP006734.1|	Leifsonia xyli subsp. cynodontis DSM 46306, complete genome	Leifsonia		126.068	260.215	1583.66	139.628
gi|302191744|gb|CP002102.1|	Brevundimonas subvibrioides ATCC 15264, complete genome	Brevundimonas		1206.08	46.7816	937.575	620.044
gi|389547812|gb|JQ402740.1|	Uncultured Acetobacteraceae bacterium clone CNY_03184 16S ribosomal RNA gene, partial sequence	Acetobacteraceae		0	855.981	0	0
gi|407894523|gb|CP003872.1|	Acidovorax sp. KKS102, complete genome	Acidovorax		715.941	784.148	704.228	845.748
gi|256635240|dbj|AP011128.1|	Acetobacter pasteurianus IFO 3283-03 DNA, complete genome	Acetobacter		24.0133	826.237	33.0628	0
gi|662020131|ref|NR_122018.1|	Sphingomonas sanxanigenens strain NX02 23S ribosomal RNA gene, complete sequence	Sphingomonas		112.474	805.523	111.307	20.914
gi|196121877|gb|CP000750.2|	Kineococcus radiotolerans SRS30216, complete genome	Kineococcus		110.831	343.343	2243.89	0
gi|507148190|ref|NR_102997.1|	Blastococcus saxobsidens strain DD2 23S ribosomal RNA gene, complete sequence	Blastococcus		121.249	678.324	365.799	41.8279
